# Supplementary material for: CCL2 is associated with microglia and macrophage recruitment in chronic traumatic encephalopathy
Source: Springer Nature journal article supplement (doi:10.1186/s12974-020-02036-4), 2020-12-01

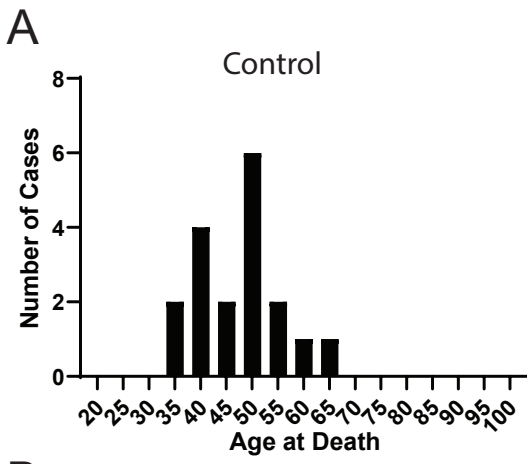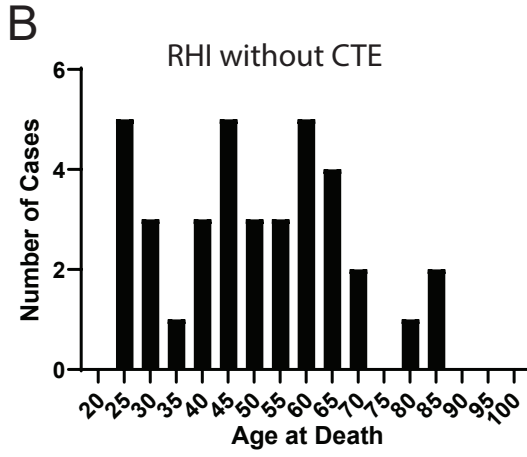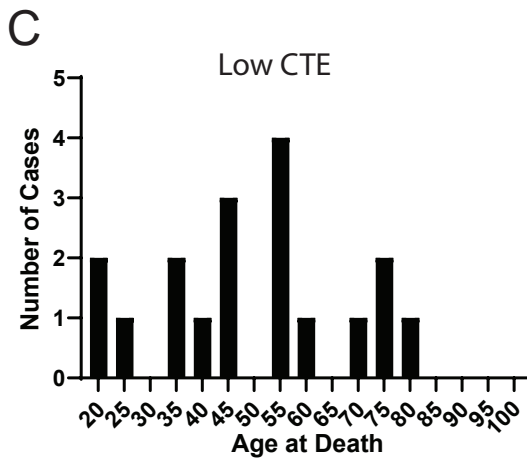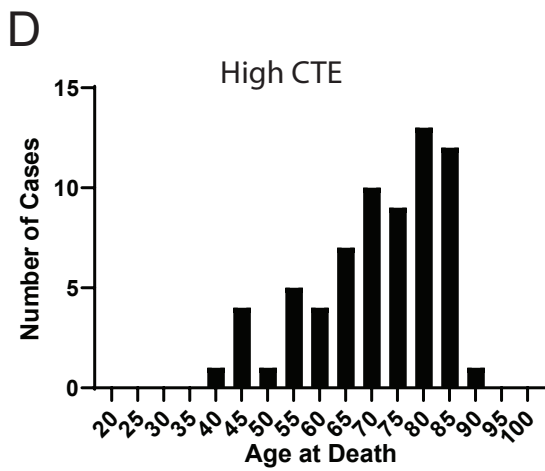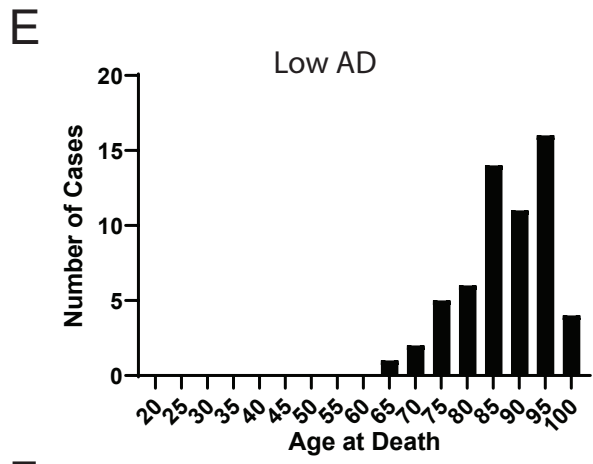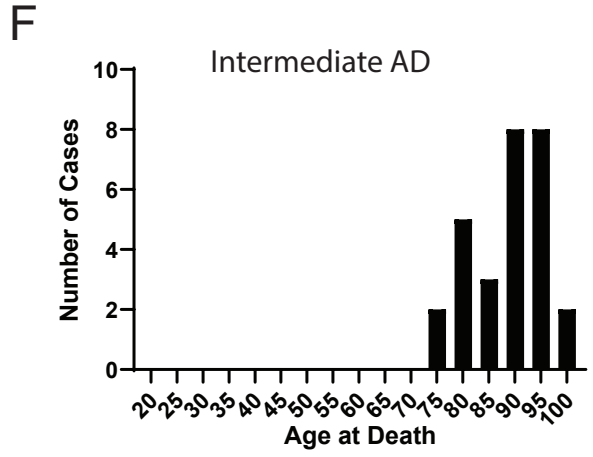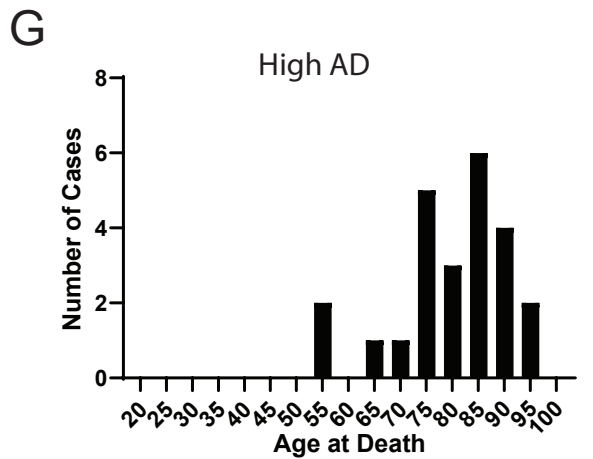

Supplement: MOESM1 [file 18659398]
